# Supplementary material for: Nitrogen-doped Ru film for energy-saving hydrogen production assisted with hydrazine oxidation
Source: Royal Society of Chemistry journal article supplement (doi:10.1039/d2cc03579k), 2022-01-01
Supplement: d2cc03579k1.pdf [file d2cc03579k1.pdf]

Electronic Supplementary Information for

**Nitrogen-doped Ru film for energy-saving hydrogen production assisted with hydrazine  
oxidation**

Ziqiang Wang, Xian Zhang, Wenjing Tian, Hongjie Yu, Kai Deng, You Xu, Xin Wang,

Hongjing Wang\* and Liang Wang\*

State Key Laboratory Breeding Base of Green-Chemical Synthesis Technology, College of  
Chemical Engineering, Zhejiang University of Technology, Hangzhou 310014, P. R. China

**Corresponding authors**

\*E-mails: [hjw@zjut.edu.cn](mailto:hjw@zjut.edu.cn), [wangliang@zjut.edu.cn](mailto:wangliang@zjut.edu.cn)

## Experimental Section

**Chemicals and Materials:** Poly(ethylene oxide)-*b*-Poly(methyl methacrylate) (PEO-*b*-PMMA) block copolymer was ordered from Polymer Source Inc. Ruthenium (III) chloride hydrate ( $\text{RuCl}_3 \cdot x\text{H}_2\text{O}$ ) was ordered from Sigma-Aldrich. Commercial  $\text{IrO}_2$  and Pt/C (20 wt%) were supplied by Alfa Aesar. Hydrazine monohydrate ( $\text{N}_2\text{H}_4 \cdot \text{H}_2\text{O}$ ), ethanol ( $\text{C}_2\text{H}_5\text{OH}$ ), potassium hydroxide (KOH), tetrahydrofuran (THF), hydrochloric acid (HCl, 36–38%) were ordered from Aladdin.

**Synthesis of N-mRu/NF:** The mRu/NF was first synthesized via electrodeposition. Typically, PEO-*b*-PMMA (5 mg) was dissolved in THF (0.5 mL) under sonication for 30 min, followed by adding  $\text{RuCl}_3$  (0.5 mL, 40 mM) and water (3.5 mL), which was used as electrolyte. The electrodeposition was conducted by CHI 660E electrochemical workstation at  $-0.6$  V for 6000 s in three-electrode cell using Ag/AgCl (saturated KCl) electrode, Pt wire and pretreated NF as the reference, counter and working electrodes, respectively. After washing with water and ethanol, the mRu/NF was obtained. Finally, the mRu/NF was placed in a tube furnace and annealed in  $\text{NH}_3$  atmosphere for 2 h at  $300^\circ\text{C}$  with a heating rate of  $2^\circ\text{C min}^{-1}$ .

**Characterizations:** Scanning electron microscopy (SEM, ZEISS SUPRA 55) and transmission electron microscopy (TEM, JEOL JEM-2010) were used to analyze morphology and microstructure of samples. The crystallographic data of samples were analyzed by X-ray diffraction (XRD) on a DX-2700 diffractometer. X-ray photoelectron spectroscopy (XPS) spectra were gathered on a Thermo Scientific K-Alpha (Kratos Analytical). All the binding energies were calibrated to C 1s adventitious carbon at 284.8 eV to eliminate differences in sample charging.

**Electrochemical measurements:** Electrochemical experiments were performed under ambient conditions using conventional three-electrode system, where the obtained sample was working electrode, graphite rod was counter electrode, and Hg/HgO electrode was reference electrode. The HER and HzOR electrolytes were 1.0 M KOH and 1.0 M KOH + 0.5 M  $\text{N}_2\text{H}_4$ , respectively. The potential was scaled to reference reversible hydrogen electrode (RHE). Linear scanning voltammetry (LSV) was performed at  $5\text{ mV s}^{-1}$ . Electrochemical impedance spectroscopy (EIS) was carried out between 100 kHz and 100 mHz.

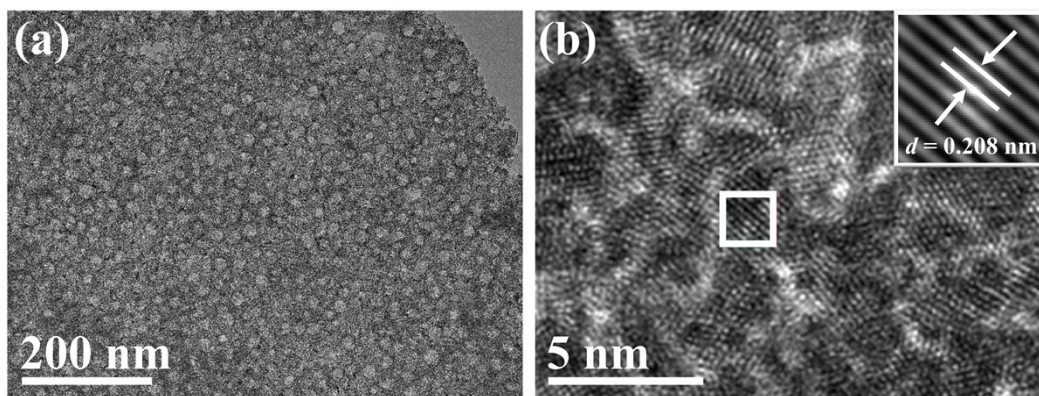

**Fig. S1** (a) TEM and (b) HRTEM images of the mRu film. The inset in (b) is the corresponding Fourier-filtered lattice stripes.

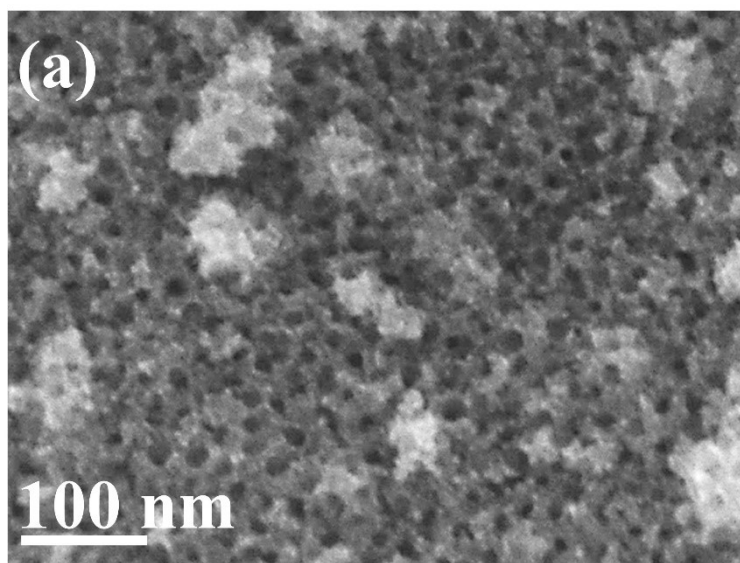

**Fig. S2** (a) SEM image of N-mRu/NF.

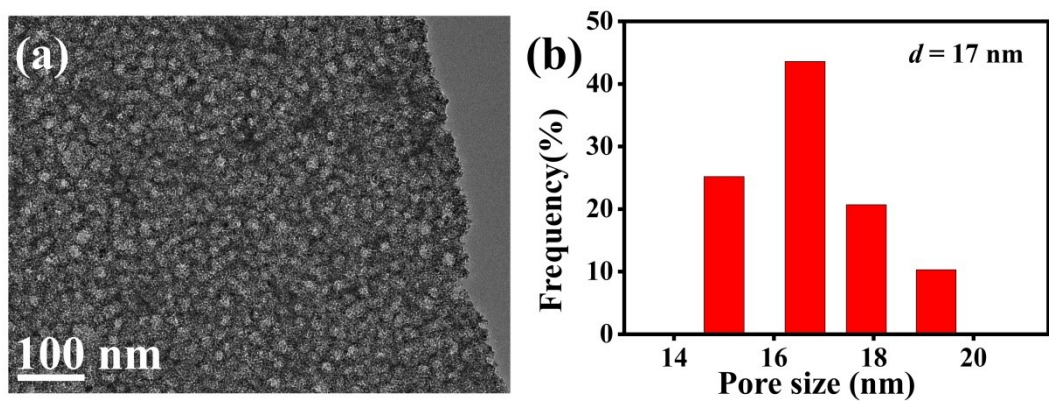

**Fig. S3** (a) TEM image and (b) pore size distribution of the N-mRu film.

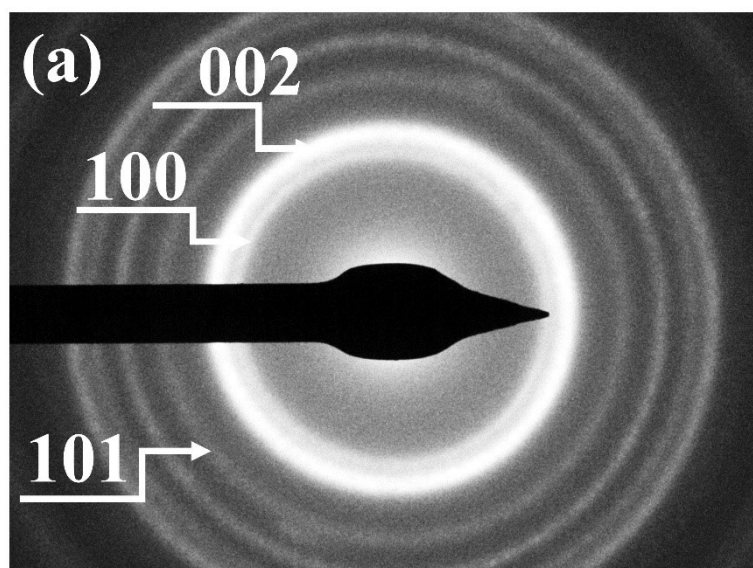

**Fig. S4** SAED pattern of N-mRu film.

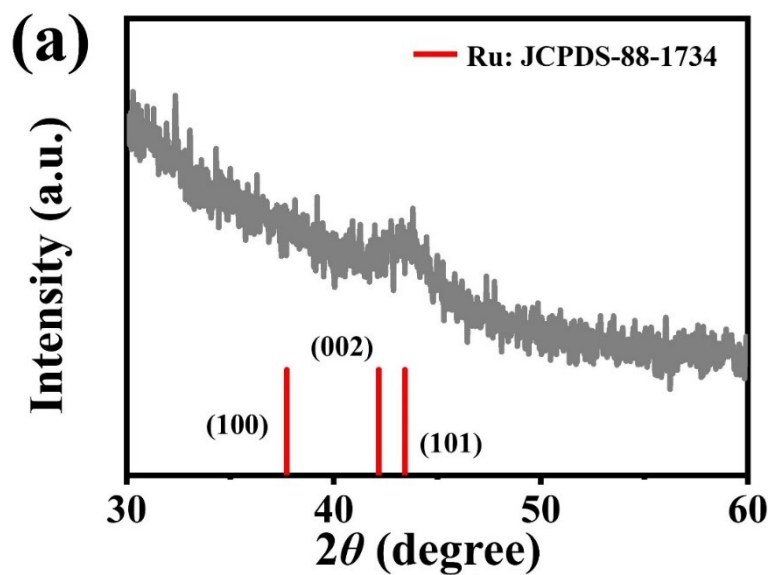

Fig. S5 XRD pattern of mRu film after  $N_2$  annealing.

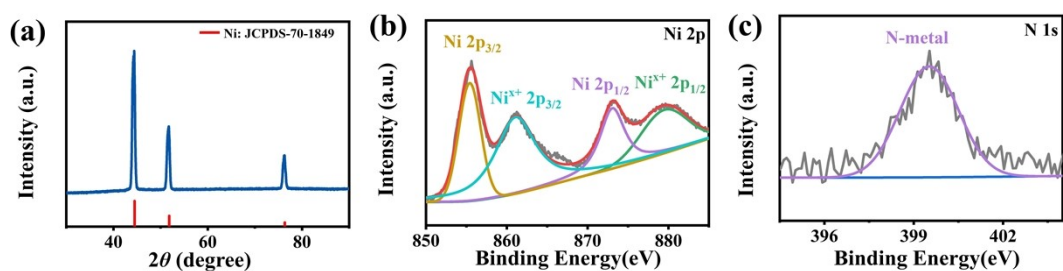

Fig. S6 (a) XRD pattern and XPS spectra of (b) Ni 2p and (c) N 1s for N-NF.

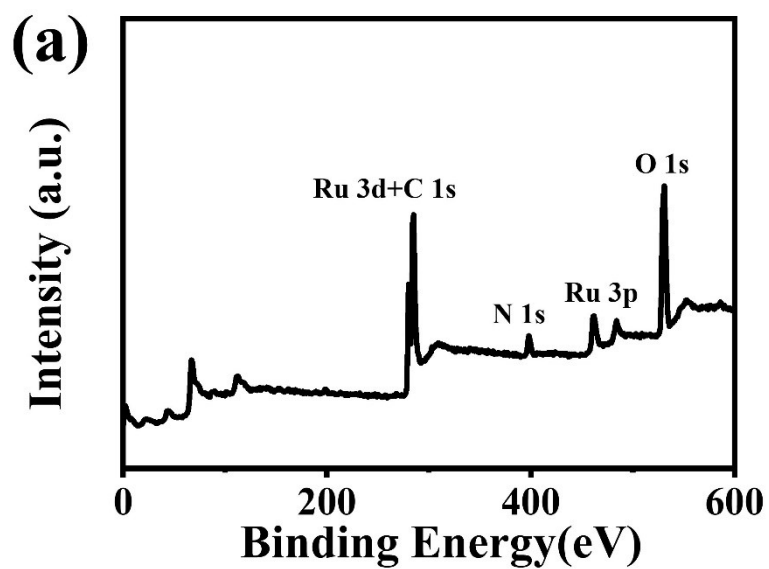

**Fig. S7** XPS survey spectrum of N-mRu/NF.

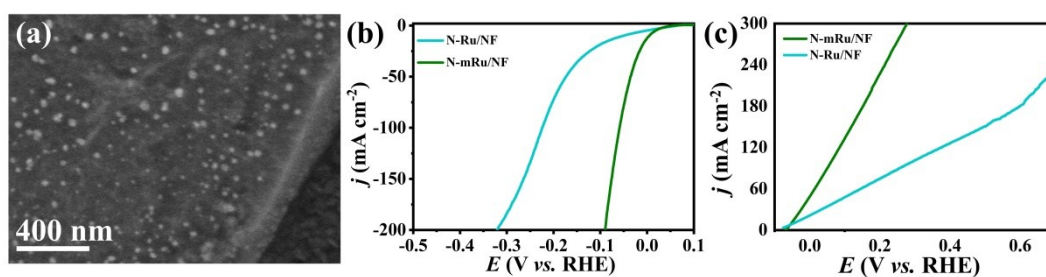

**Fig. S8** (a) SEM image of the N-Ru/NF and its LSV curves in (b) 1.0 M KOH and (c) 1.0 M KOH + 0.5 M N<sub>2</sub>H<sub>4</sub>.

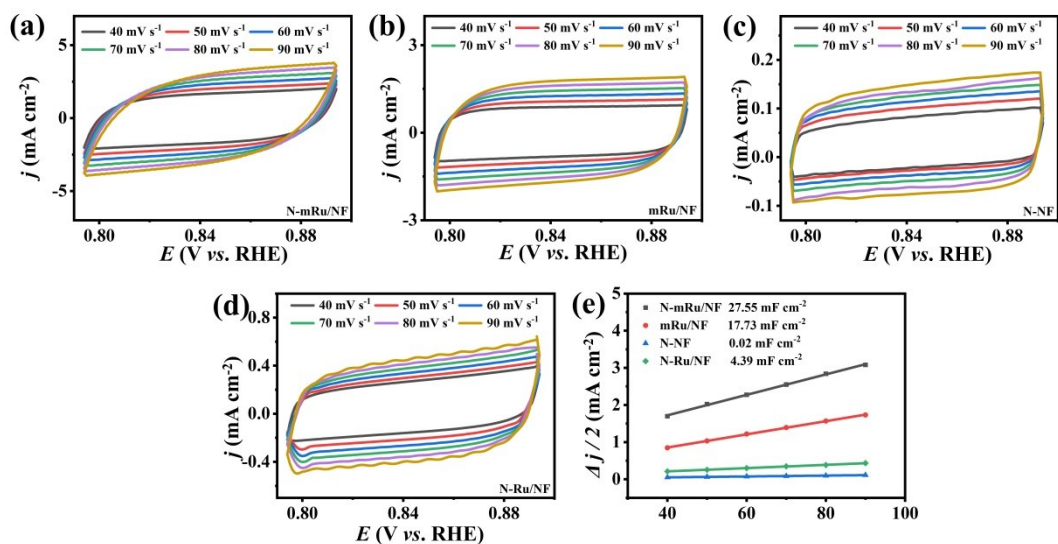

**Fig. S9** CV curves of different samples in the range of 0.794 to 0.894 V and corresponding fitted plots.

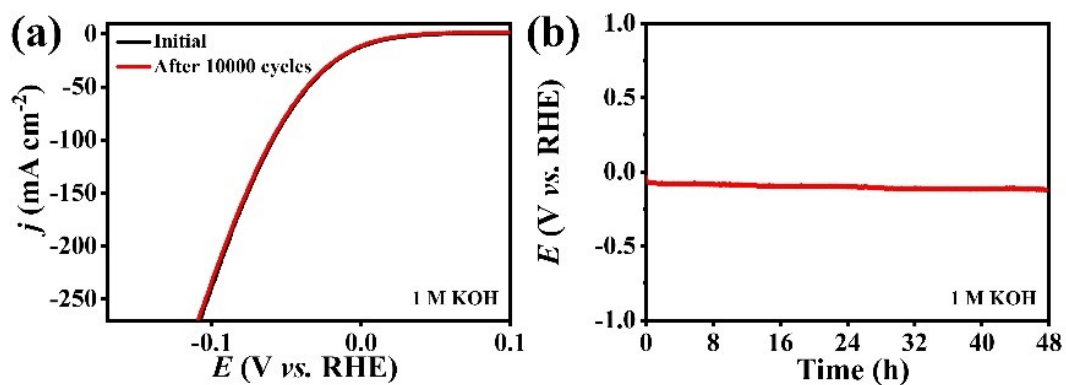

**Fig. S10** (a) LSV curves of N-mRu/NF before and after 10,000 CV cycles. (b) Long-term stability test at -20 mA cm<sup>-2</sup>.

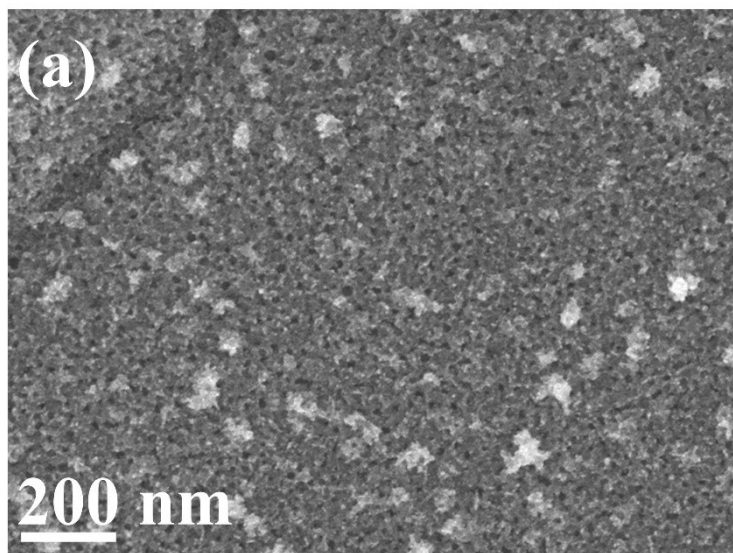

**Fig. S11** SEM image of N-mRu/NF after HER stability test.

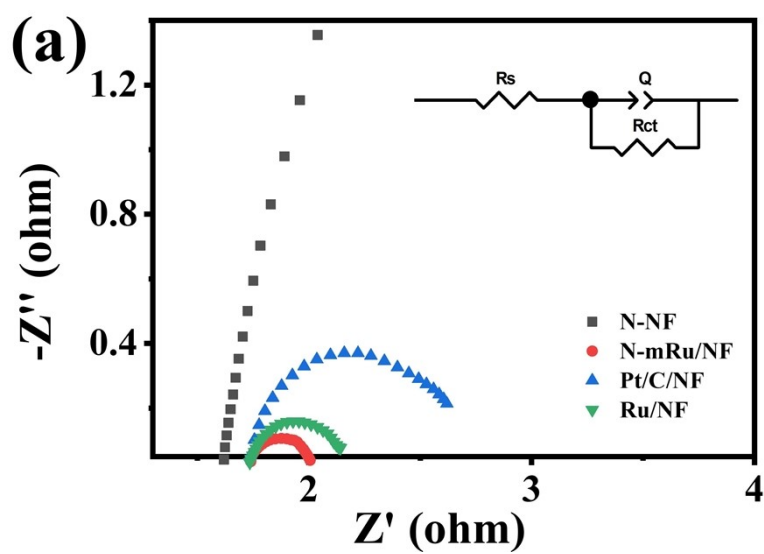

**Fig. S12** EIS spectra of samples at 0.044 V in 1.0 M KOH + 0.5 M  $N_2H_4$ .

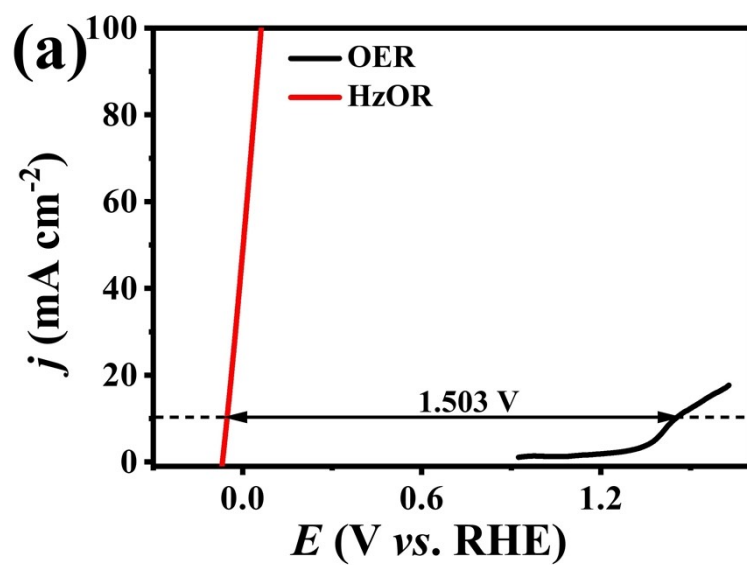

**Fig. S13** LSV curves of N-mRu/NF for OER and HzOR.

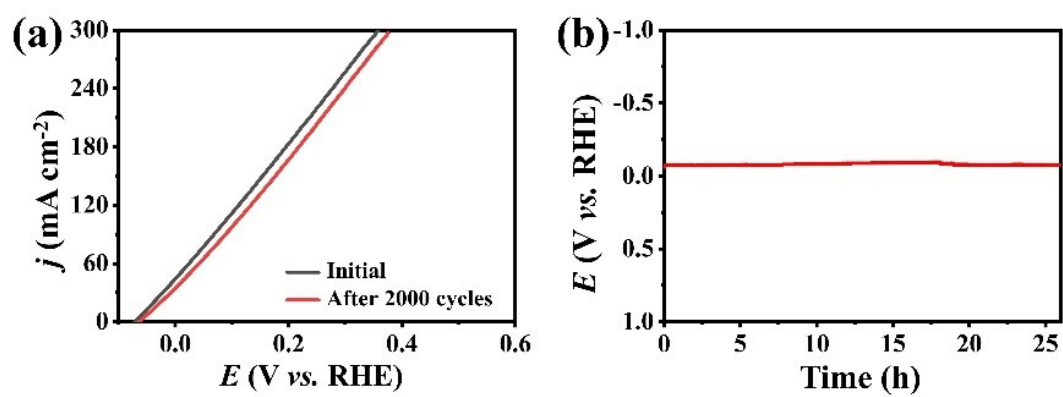

**Fig. S14** (a) HzOR polarization curves of N-mRu/NF before and after 2000 CV cycles. (b) Long-term stability test at  $10 \text{ mA cm}^{-2}$ .

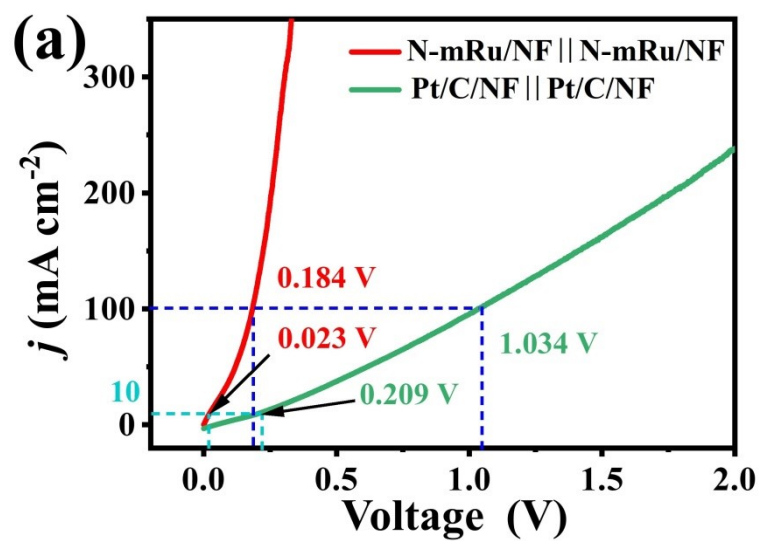

**Fig. S15** LSV curves of N-mRu/NF||N-mRu/NF and Pt/C/NF||Pt/C/NF systems for overall hydrazine electrolysis.

**Table S1.** Summary of the representative reports on electrocatalytic HER at ambient conditions

| Catalyst                             | Electrolyte    | Overpotential                            | Ref.             |
|--------------------------------------|----------------|------------------------------------------|------------------|
| <b>N-mRu/NF</b>                      | <b>1 M KOH</b> | <b>-60 mV at -100 mA cm<sup>-2</sup></b> | <b>This work</b> |
| NF/mRh@PANI                          | 1 M KOH        | -69 mV at -100 mA cm <sup>-2</sup>       | 1                |
| Pt-Co(OH) <sub>2</sub> /CC           | 1 M KOH        | -122 mV at -100 mA cm <sup>-2</sup>      | 2                |
| PdS NSs                              | 1 M KOH        | -233 mV at -100 mA cm <sup>-2</sup>      | 3                |
| Ru-TA /ACC                           | 1 M KOH        | -95 mV at -50 mA cm <sup>-2</sup>        | 4                |
| RuSe <sub>2</sub>                    | 1 M KOH        | -90.1 mV at -100 mA cm <sup>-2</sup>     | 5                |
| RhPx@NPC                             | 1 M KOH        | -69 mV at -10 mA cm <sup>-2</sup>        | 6                |
| CoSe <sub>2</sub> /MoSe <sub>2</sub> | 1 M KOH        | -168 mV at -10 mA cm <sup>-2</sup>       | 7                |
| Rh/N-CBs                             | 1 M KOH        | -77 mV at -10 mA cm <sup>-2</sup>        | 8                |
| RuP <sub>2</sub> @NPC                | 1 M KOH        | -52 mV at -10 mA cm <sup>-2</sup>        | 9                |
| PdH-NDs                              | 1 M KOH        | -358 mV at -10 mA cm <sup>-2</sup>       | 10               |

**Table S2.** Summary of the representative reports on electrocatalytic HzOR at ambient conditions

| Catalyst                           | Electrolyte                                     | Overpotential (V)<br>at 10 mA cm <sup>-2</sup> | Ref.             |
|------------------------------------|-------------------------------------------------|------------------------------------------------|------------------|
| <b>N-mRu/NF</b>                    | <b>1 M KOH+0.5 M N<sub>2</sub>H<sub>4</sub></b> | <b>-0.052</b>                                  | <b>This work</b> |
| Rh <sub>2</sub> S <sub>3</sub> /NC | 1 M KOH +0.1 M N <sub>2</sub> H <sub>4</sub>    | 0.095                                          | 11               |
| Mo–Ni <sub>3</sub> N/Ni/NF         | 1 M KOH +0.1 M N <sub>2</sub> H <sub>4</sub>    | -0.0003                                        | 12               |
| Cu <sub>1</sub> Ni <sub>2</sub> -N | 1 M KOH +0.5 M N <sub>2</sub> H <sub>4</sub>    | 0.0005                                         | 13               |
| NiFe(OH) <sub>2</sub> -SD/NF       | 1 M KOH +0.5 M N <sub>2</sub> H <sub>4</sub>    | 0.06                                           | 14               |
| Ni NCNA                            | 1 M KOH +0.3 M N <sub>2</sub> H <sub>4</sub>    | -0.026                                         | 15               |
| RhIr MNs                           | 1 M KOH +0.5 M N <sub>2</sub> H <sub>4</sub>    | -0.012                                         | 16               |
| CoSe <sub>2</sub>                  | 1 M KOH+0.5 M N <sub>2</sub> H <sub>4</sub>     | -0.017                                         | 17               |
| PW-Co <sub>3</sub> N               | 1 M KOH +0.1 M N <sub>2</sub> H <sub>4</sub>    | -0.055                                         | 18               |
| Ni (Cu)@NiFeP/NM                   | 1 M KOH+0.5 M N <sub>2</sub> H <sub>4</sub>     | 0.117                                          | 19               |

## References

1. Z. Y. Duan, K. Deng, C. J. Li, M. Zhang, Z. Q. Wang, Y. Xu, X. N. Li, L. Wang and H. J. Wang, *Chem. Eng. J.*, 2022, **428**, 132646.
2. Z. Xing, C. Han, D. Wang, Q. Li and X. Yang, *ACS Catal.*, 2017, **7**, 7131-7135.
3. Y. Wang, K. Xu, Z. Zhu, W. Guo, T. Yu, M. He, W. Wei and T. Yang, *Chem. Commun.*, 2021, **57**, 1368-1371.
4. J. Chen, H. Wang, Y. Gong and Y. Wang, *J. Mater. Chem. A*, 2019, **7**, 11038-11043.
5. Z. Zhang, C. Jiang, P. Li, K. Yao, Z. Zhao, J. Fan, H. Li and H. Wang, *Small*, 2021, **17**, 2007333.
6. J. Q. Chi, X. J. Zeng, X. Shang, B. Dong, Y. M. Chai, C. G. Liu, M. Marin and Y. Yin, *Adv. Funct. Mater.*, 2019, **29**, 1901790.
7. X. Tang, J.-Y. Zhang, B. Mei, X. Zhang, Y. Liu, J. Wang and W. Li, *Chem. Eng. J.*, 2021, **404**, 126529.
8. N. Jia, Y. Liu, L. Wang, P. Chen, X. Chen, Z. An and Y. Chen, *ACS Appl. Mater. Interfaces*, 2019, **11**, 35039-35049.
9. Z. Pu, I. S. Amiinu, Z. Kou, W. Li and S. Mu, *Angew. Chem., Int. Ed.*, 2017, **56**, 11559-11564.
10. H. Y. Sun, Y. Ding, Y. Q. Yue, Q. Xue, F. M. Li, J. X. Jiang, P. Chen and Y. Chen, *ACS Appl. Mater. Interfaces*, 2021, **13**, 13149-13157.
11. C. Zhang, H. Liu, Y. Liu, X. Liu, Y. Mi, R. Guo, J. Sun, H. Bao, J. He, Y. Qiu, J. Ren, X. Yang, J. Luo and G. Hu, *Small Methods*, 2020, **4**, 2000208.
12. Y. Liu, J. Zhang, Y. Li, Q. Qian, Z. Li and G. Zhang, *Adv. Funct. Mater.*, 2021, **31**, 2103673.

13. Z. Wang, L. Xu, F. Huang, L. Qu, J. Li, K. A. Owusu, Z. Liu, Z. Lin, B. Xiang, X. Liu, K. Zhao, X. Liao, W. Yang, Y. B. Cheng and L. Mai, *Adv. Energy Mater.*, 2019, **9**, 1900390.
14. P. Babar, A. Lokhande, V. Karade, I. J. Lee, D. Lee, S. Pawar and J. H. Kim, *J. Colloid Interface Sci.*, 2019, **557**, 10-17.
15. Y. Li, J. Li, Q. Qian, X. Jin, Y. Liu, Z. Li, Y. Zhu, Y. Guo and G. Zhang, *Small*, 2021, **17**, 2008148.
16. M. Zhang, Z. Wang, Z. Duan, S. Wang, Y. Xu, X. Li, L. Wang and H. Wang, *J. Mater. Chem. A*, 2021, **9**, 18323-18328.
17. J. Y. Zhang, H. Wang, Y. Tian, Y. Yan, Q. Xue, T. He, H. Liu, C. Wang, Y. Chen and B. Y. Xia, *Angew. Chem., Int. Ed.*, 2018, **57**, 7649-7653.
18. Y. Liu, J. Zhang, Y. Li, Q. Qian, Z. Li, Y. Zhu and G. Zhang, *Nat. Commun.*, 2020, **11**, 1853.
19. Q. Sun, M. Zhou, Y. Shen, L. Wang, Y. Ma, Y. Li, X. Bo, Z. Wang and C. Zhao, *J. Catal.*, 2019, **373**, 180-189.
